# Supplementary material for: Blocking TLR2 Activity Attenuates Pulmonary Metastases of Tumor
Source: PLOS journal article supplement (doi:10.1371/journal.pone.0006520), 2009-08-04
Supplement: S7 (10.1371/journal.pone.0006520.s007) [file journal.pone.0006520.s007]

**Table S1. Primer sequence for Real time or RT PCR.**

| **Oligo name** | **Primer sequences (5’-3’)** | **Temperature (ºC)** |
| --- | --- | --- |
| β-actin For | GAAATCGTGCGTGACATCAAAG | 60.4 |
| β-actin Rev | TGTAGTTTCATGGATGCCACAG | 60.3 |
| TLR1 For | TGAGGGTCCTGATAATGTCCTAC | 60.4 |
| TLR1 Rev | AGAGGTCCAAATGCTTGAGGC | 62.4 |
| TLR2 For | ACAATAGAGGGAGACGCCTTT | 60.6 |
| TLR2 Rev | AGTGTCTGGTAAGGATTTCCCAT | 60.8 |
| TLR3 For | ATTGGGTCTGGGAACATTTCTCTTC | 61.3 |
| TLR3 Rev | GTGAGATTTAAACATTCCTCTTCGC | 59.7 |
| TLR4 For | GCCTTTCAGGGAATTAAGCTCC | 61.0 |
| TLR4 Rev | AGATCAACCGATGGACGTGTAA | 61.2 |
| TLR5 For | CATTGTATGCACTGTCACTC | 55.2 |
| TLR5 Rev | CCACCACCATGATGAGAGCA | 59.4 |
| TLR6 For | AGGAACCTTACTCATGTCCCC | 60.6 |
| TLR6 Rev | TGTTGTGGGAGAGTCTCAGAA | 60.1 |
| TLR7 For | TCTTACCCTTACCATCAACCACA | 60.7 |
| TLR7 Rev | CCCCAGTAGAACAGGTACACA | 60.5 |
| TLR8 For | CAGAATAGCAGGCGTAACACATCA | 61.0 |
| TLR8 Rev | AATGTCACAGGTGCATTCAAAGGG | 61.0 |
| TLR9 For | ATGGTTCTCCGTCGAAGGACT | 62.7 |
| TLR9 Rev | GAGGCTTCAGCTCACAGGG | 62.0 |
| CCL22 For | AGGTCCCTATGGTGCCAATGT | 61.0 |
| CCL22 Rev | CGGCAGGATTTTGAGGTCCA | 61.0 |
| CCR8 For | CCTGGTCATCTTAGTCCTCGT | 61.0 |
| CCR8 Rev | AGCAGGTTGTGGGTCTGAAAA | 61.0 |
